1 The regulation of methylation on the Z chromosome and the  
2 identification of multiple novel Male Hyper-Methylated regions  
3 in the chicken.

4  
5  
6  
7  
8  
9

Höglund, A.<sup>1</sup>, Henriksen, R.<sup>1</sup>, Churcher, A.M.<sup>2</sup>, Guerrero-Bosagna, C.G.<sup>1</sup>, Martinez-Barrío, A.<sup>3</sup>, Johnsson, M.<sup>4</sup>, Jensen, P.<sup>1</sup>, Wright, D.<sup>1</sup>

10 <sup>1</sup>AVIAN Behavioural Genomics and Physiology Group, Linköping University, Linköping  
11 58183, Sweden

12

13 <sup>2</sup>NBIS, Umeå University, Department of Molecular Biology, 901 87, Umeå Sweden

14

15 <sup>3</sup>NBIS, Uppsala University, SciLifeLab, Box 596, S-75124 Uppsala, Sweden

16

17 <sup>4</sup>Department of Animal Breeding and Genetics, Swedish University of Agricultural  
18 Sciences, Box 7023, 750 07 Uppsala, Sweden.

19

20

21 Abstract

22 DNA methylation is a key regulator of eukaryote genomes, and is of particular  
23 relevance in the regulation of gene expression on the sex chromosomes, with a key  
24 role in dosage compensation in mammalian XY systems. In the case of birds, dosage  
25 compensation is largely absent, with it being restricted to two small Male Hyper-  
26 Methylated (MHM) regions on the Z chromosome. To investigate how variation in  
27 DNA methylation is regulated on the Z chromosome we utilised a wild x domestic  
28 advanced intercross in the chicken, with both hypothalamic methylomes and  
29 transcriptomes assayed in 124 individuals. The relatively large numbers of individuals  
30 allowed us to identify additional genomic MHM regions on the Z chromosome that  
31 were significantly differentially methylated between the sexes. These regions appear  
32 to down-regulate local gene expression in males, but not remove it entirely (unlike  
33 the lncRNAs identified in the initial MHM regions). In addition, trans effect hotspots  
34 were also identified that were based on the autosomes but affected the Z, and also  
35 that were based on the Z chromosome but that affected autosomal DNA methylation  
36 regulation. In addition, quantitative trait loci (QTL) that regulate variation in  
37 methylation on the Z chromosome, and those loci that regulate methylation on the  
38 autosomes that derive from the Z chromosome were mapped. Trans-effect hotspots  
39 were also identified that were based on the autosomes but affected the Z, and also  
40 one that was based on the Z chromosome but that affected both autosomal and sex  
41 chromosome DNA methylation regulation. Our results highlight how additional MHM  
42 regions are actually present on the Z chromosome, and they appear to have smaller-  
43 scale effects on gene expression in males. Quantitative variation in methylation is  
44 also regulated both from the autosomes to the Z chromosome, and from the Z  
45 chromosome to the autosomes.

46

47

48

## 49 Introduction

50 DNA methylation is one of the key regulators of eukaryotic genomes, and can both  
51 inhibit (Gaston and Fried 1995, Mann, Chatterjee et al. 2013) and enhance gene  
52 expression (Yin, Morgunova et al. 2017, Höglund, Henriksen et al. 2020), depending  
53 on where the DNA methylation occurs. This DNA methylation can be  
54 environmentally driven (Nalvarte, Rüegg et al. 2018), but can also be modified and  
55 regulated via DNA variation (Kasowski, Kyriazopoulou-Panagiotopoulou et al. 2013,  
56 Kilpinen, Waszak et al. 2013, McVicker, van de Geijn et al. 2013, Bélteky, Agnvall et  
57 al. 2018, Guerrero-Bosagna 2019). We have previously addressed this using a wild x  
58 domestic chicken model to study the regulation of variation in autosomal DNA  
59 methylation, and how it can quantitatively regulate gene expression using a QTL  
60 mapping based approach. This enabled us to identify how domestication in the  
61 chicken led to a small number of large-effect trans hotspots, where these loci  
62 regulated variation in DNA methylation throughout the genome. Moreover, we  
63 found methylation to not only be the driver but also the response to gene expression  
64 variation (Höglund, Henriksen et al. 2020). However, the corresponding regulation of  
65 DNA methylation variation on the Z chromosome is still lacking. For example, the  
66 extent to which quantitative variation in DNA methylation is controlled between the  
67 autosomes and sex chromosomes is an open question, as is the extent to which DNA  
68 methylation is regulated on the Z chromosome in general. Given the role that DNA  
69 methylation plays in dosage compensation on the Z chromosome in the chicken, this  
70 is particularly relevant.

71

72

73 Dosage compensation prevents the expression imbalance originating from the  
74 number of sex chromosomes present in males or females when homo- and hetero-  
75 gametic sexes exist. Dosage compensation occurs when the dose effect due to one  
76 sex having only a single sex chromosome, and therefore half the number of gene  
77 copies, is compensated by either decreasing gene expression in the homogamete or  
78 increasing expression in the heterogamete. This can be over the whole sex  
79 chromosome or over specific regions (Mank 2013). Dosage compensation is less  
80 well-described in ZW systems, with the female typically being heterogametic, in

81 contrast to the mammalian XY systems (Itoh, Melamed et al. 2007, Vicoso and  
82 Bachtrog 2011). In the mammalian XY system, dosage compensation is achieved by X  
83 inactivation, achieved via epigenetic mechanisms, notably DNA methylation and  
84 histone modification (Fang, Disteché et al. 2019). However, such chromosomal  
85 inactivation is largely absent from birds, with instead very incomplete and location-  
86 specific dosage compensation, if any (Ellegren, Hultin-Rosenberg et al. 2007, Mank  
87 and Ellegren 2009). Despite this, gene expression on the Z in males is not double that  
88 of females, but instead genes on the Z are on average around 30% upregulated in  
89 males (Ellegren, Hultin-Rosenberg et al. 2007, Melamed and Arnold 2007, Mank and  
90 Ellegren 2009).

91  
92 DNA methylation still plays an important role for sex difference regulation on  
93 the avian Z chromosome. In particular, the Male Hyper-Methylated (MHM) region at  
94 27.3Mb was first discovered by Teranishi and colleagues (Teranishi, Shimada et al.  
95 2001), whilst more recently an additional region on 73.16-73.17Mb was also  
96 identified on the Z chromosome (Sun, Maney et al. 2019). With the initial region, it  
97 was found that males had greatly increased methylation in an approximately 500kb  
98 area, with nine genes that were present there not being expressed in males. In the  
99 case of the more recently discovered MHM region at 73.16Mb (designated MHM2),  
100 this was smaller and contained three long non coding RNAs (lncRNAs) that were  
101 female-biased in expression. In general, these studies are based on small numbers of  
102 samples, generally focussing on between species comparisons (for example, one  
103 great tit sample was used in Laine et al. 2016, two pooled samples from Whole  
104 Genome Bisulfite sequenced chicken were used in (Zhang, Yan et al. 2017), and one  
105 male and one female White Throated Swallow was used in (Sun, Maney et al. 2019)).  
106 This makes it harder to detect smaller regions, and in particular the scope of inter-  
107 individual variation in these MHM regions. This is concerning, particularly  
108 considering the degree of DNA methylation variation across individuals in  
109 populations and the role of methylation in phenotype formation (Heyn, Moran et al.  
110 2013). Large-scale analysis of within species variation could give a better resolution  
111 of hypermethylated regions as well as detect differences between individuals in sex-  
112 specific methylation and gene regulation. Various questions still remain regarding

113 the MHM regions, and the genes they contain. The sizes of the MHM regions and the  
114 effects of the decreased gene expression is particularly noteworthy – are these  
115 genes involved in fundamental sex differences? Similarly, are the genes within these  
116 MHM regions regulated in a region-by-region basis or on a gene-by-gene basis? Gene  
117 expression regulation via methylation is not restricted to solely promoter regions  
118 (Kasowski, Kyriazopoulou-Panagiotopoulou et al. 2013), but can affect gene  
119 expression (both positively and negatively) due to effects at enhancer sites,  
120 Transcriptional Elements (TEs) and the like. For example, our previous study based  
121 on autosomal methylation variation in the chicken found that there was a bias to  
122 being positively correlated, whilst correlations between methylation and gene  
123 expression could be found within a megabase upstream and downstream of the  
124 gene itself (Höglund, Henriksen et al. 2020). Given this, how far away from these  
125 MHM regions are genes being affected? Is this still affecting dosage compensation if  
126 it upregulates genes?

127

128         To investigate how DNA methylation variation is regulated on the Z  
129 chromosome, as well as the potential role of methylation in dosage compensation  
130 and sex differences, we conducted a DNA methylation quantitative trait locus  
131 (methylation QTL) analysis using an advanced intercross between domestic chickens  
132 and wild Red Junglefowl. We assayed the hypothalamic transcriptome and  
133 methylome on the Z chromosome for 124 individuals, having previously assayed the  
134 autosomes for these individuals. It was therefore possible to map both *cis* and *trans*  
135 related loci that modulate variation in DNA methylation on the Z chromosome, as  
136 well as to assess how methylation is used to regulate sex-differences in gene  
137 expression on the Z chromosome.

138

139

140

## 141 **Methods**

142 The study population was composed of 124 chickens (55 females, 69 males) from  
143 which the hypothalamus tissue was dissected out at day 212. The individuals used  
144 were from an 8th generation advanced intercross, founded using a Red Junglefowl  
145 (wild) male and three White Leghorn (domestic) females. A detailed description of  
146 the intercross generation, housing conditions, etc can be found in (Johnsson,  
147 Gustafson et al. 2012).

148

### 149 **RNA and DNA methylation isolation**

150 RNA was isolated from the hypothalamus tissue which was homogenised using  
151 Ambion TRI Reagent (Life Technologies) following the manufacturer's protocol. cDNA  
152 synthesis and microarray-based gene expression were performed using a Nimblegen  
153 135k array, as described previously (Johnsson, Williams et al. 2016). DNA was  
154 isolated from the remainder of the TRI reagent homogenate by mixing 125µl ice-cold  
155 99% ethanol with 250µl TRI reagent homogenate. Samples were vortexed, incubated  
156 on ice for 5min and centrifuged at 12'000 RPM for 10 min in room temperature. The  
157 pellet was saved and isolation continued using the DNeasy Blood & Tissue Kit  
158 (Qiagen) following the manufacturer's protocol. DNA methylation was assessed by  
159 Methylated DNA immunoprecipitation (MeDIP) protocol. Further details of the  
160 MeDIP protocol can be found in (Höglund, Henriksen et al. 2020).

161

### 162 **Phenotypes: methylation and gene expression**

163 DNA methylation phenotypes were generated by dividing the chicken genome into  
164 1000bp windows, yielding a total of 1050176 methylation windows, of which 82426  
165 were located on chromosome Z. The MeDIP-seq reads were mapped to each  
166 methylation window and normalised by dividing with the total read count for each  
167 individual respectively. Sequencing was performed on an IonProton machine  
168 (Thermo Fisher Scientific) using the Torrent Suite software (version 4.4.1) by the  
169 National Genomics Infrastructure in Uppsala, Sweden. The sequence depth was on  
170 average  $3.4X \pm 0.97$  (standard deviation), the read length was on average  $136 \pm 15$   
171 bp, the raw reads was on average 23.8 million  $\pm 5.2$  and the quality score was on

172 average  $22 \pm 1$ . The Gene expression dataset has been published previously  
173 (Johnsson, Williams et al. 2016) and was based on the NimbleGen 12 x 135K Custom  
174 Gene expression array, mapping to 22628 unique genes composed of Ensembl,  
175 RefSeq genes and Expressed Sequence Tags.

176

### 177 **Quantitative Trait Loci (QTL) analysis**

178 Quantitative Trait Loci (QTL) analysis was performed to identify genomic regions  
179 associated with the variation found within DNA methylation levels for the 1 million  
180 methylation windows. A genetic marker map was generated using 652 SNP markers,  
181 of which 542 were fully informative between the original parental animals used to  
182 generate the intercross. Average marker distance was  $\sim 16$  cM, as per  
183 recommendations (Darvasi and Soller 1994). Of these, 36 markers were present on  
184 the Z chromosome with a 15cM average marker distance. Note that as the intercross  
185 is a linkage-based cross and not a GWAS of an outbred population (which relies on  
186 linkage disequilibrium and has built up historical recombinations over hundreds of  
187 generations) far fewer markers are required to cover the genome, as it is only  
188 required to identify the recombinations that have accrued during the intercrossing  
189 (Lynch and Walsh 1998). Details of the genetic marker locations can be found in  
190 Johnsson et al (Johnsson, Rubin et al. 2014). Interval mapping was performed using  
191 the “qtl2” R-package (Broman, Gatti et al. 2019). This package was used as it is able  
192 to correctly analyse sex chromosomes in an advanced intercross. A local (cis) scan  
193 was performed, restricted to methylation windows present on the Z chromosome,  
194 with the local region considered to be within 50cM up- and down-stream of each  
195 methylation window. A trans scan was also performed. In the case of the trans scan,  
196 a full genome scan was performed for trans effect methylation QTL that were  
197 located on either the autosomes or Z chromosome that affected methylation on the  
198 Z chromosome. In addition, a scan was also performed for trans methylation QTL  
199 located on the Z chromosome that were associated with methylation present on the  
200 autosomes. Sex and batch were set as covariates in the test model, with sex also  
201 used as an interactive covariate, where significant (if the LOD score of the sex  
202 interaction model was  $>1$  LOD higher than the non-sex interaction model).  
203 Significance thresholds were determined via a permutation test with and without sex

204 interactions for both local (cis) and trans methylation QTL. Local (putatively cis)  
205 regions were defined as 50cM up and downstream to the closest genetic marker,  
206 whilst anything outside this region was defined as trans. For the trans permutations,  
207 20000 random methylation phenotypes were permuted 1000 times each, both for  
208 sex and non-sex interaction, and for cis permutations 17000 random phenotypes  
209 permuted 1000 times each. From the permutations the top 5 % LOD-scores for each  
210 phenotype were saved and from these the top 5% were chosen as significance  
211 threshold and the top 20% as the suggestive threshold, respectively. This yielded  
212 significance cis LOD-score of 5.73 (sex interaction) and 4.29, (no sex interaction),  
213 with suggestive thresholds of 4.87 and 3.58. For the trans thresholds, significance  
214 was at LOD-score of 7.70 and 7.68 (sex and non-sex interaction, respectively), whilst  
215 the suggestive threshold was 5.92 and 5.93.

216

217 Gene expression QTL (eQTL) analysis was performed using R/qtl, using RMA  
218 preprocessed (Irizarry, Bolstad et al. 2003) expression levels as quantitative  
219 phenotypes with sex and batch as additive covariates. The same criteria for cis-  
220 eQTL was applied as for the autosomes (see (Johnsson, Williams et al. 2016),  
221 with local eQTL defined as those within +/-50cM of the gene, with trans referring  
222 to any other location. Significance thresholds for cis and trans eQTL were 4.0 and  
223 6.0, respectively.

224

225

### 226 **Male Hyper-Methylated (MHM) region**

227 The MHM region was identified using the transcript deposited in the NCBI GenBank  
228 by (Teranishi, Shimada et al. 2001), accession AB046698 (2332 bp), with this being  
229 the probe sequence used to identify the region initially. This sequence maps to two  
230 genomic locations: chrZ:27375241-27391116 (99.1% match) and chrZ:27329191-  
231 27333743 (98.9% match), hereafter referred to as MHMa and MHMb respectively.  
232 The MHMa and MHMb regions were corroborated in our dataset and the  
233 parameters for methylation levels obtained were used to identify other MHM-like  
234 regions. These parameters were: median methylation status per window of > 8.52, a  
235 sex difference equal to a Wilcoxon rank sum test/Mann-Whitney test p-value <



236 1.75e-10 and comprising of five or more adjacent methylation windows (i.e. these  
237 values are those identified for the original MHM region in our dataset).

238

### 239 **QTL overlaps**

240 With both mQTL and eQTL mapped it was possible to assess whether any  
241 correlations could be found between DNA methylation levels and gene expression  
242 which are both associated to a locus. By overlapping the confidence intervals of the  
243 mQTL and eQTL, and regressing the gene expression with methylation, genomic  
244 regions that putatively control either the methylation or gene expression (or both)  
245 were observed. The correlation was tested with all individuals and sex as a factor,  
246 and with the sexes separate, yielding 3 models. Any genes that significantly  
247 correlated with a methylation window were finally tested for causality using the  
248 Network Edge Orientation (NEO) package in R (Aten, Fuller et al. 2008). In this way, it  
249 is possible to ascribe hypothetical orientation of the regulatory relationship, whether  
250 DNA methylation regulates gene expression or vice versa. Significance using the NEO  
251 package is based on the LEO.NB score, which quantifies the support of the best  
252 fitting causal model versus the second best fitting model. As both the eQTL and  
253 methylation QTL originated from the same genotype (imputed marker position) and  
254 thus are treated as a single-marker orientation with a LEO.NB.OCA-score > 1.0  
255 considered significant, and a score of > 0.8 as suggestive.

256

257

### 258 **Data availability**

259 Gene expression data (generated with Microarray) for the hypothalamus tissue is  
260 available at Arrayexpress [[https://www.ebi.ac.uk/arrayexpress/experiments/E-](https://www.ebi.ac.uk/arrayexpress/experiments/E-MTAB-3154/)  
261 [MTAB-3154/](https://www.ebi.ac.uk/arrayexpress/experiments/E-MTAB-3154/)]. The genotypes scored for the QTL analysis is available at Figshare  
262 [<https://doi.org/10.6084/m9.figshare.12803876>].

263 The DNA methylation data (generated with MeDIP) is available at:

264 <https://doi.org/10.6084/m9.figshare.12803873>

265 Finally, the readymade QTL cross-file is available at:

266

## 267 Results

### 268 Dosage Compensation and the Male Hyper Methylated (MHM) Region

269 To assess the degree of male-biased hyper methylated regions, we first analysed the  
270 previously known hyper methylated regions –MHMa and MHMb. These two regions,  
271 situated at 27.375Mb and 27.329Mb respectively, had a 3.3 and 3.6-fold increase in  
272 methylation in males, respectively, with these ratios being highly significant (max  
273 Wilcoxon pvalue < 4e-10 and 1.7e-10, respectively, for each region), see  
274 Supplementary Table 1). The original MHM region was hypothesised to be  
275 approximately 460kb in length (Teranishi et al. 2001). When we assessed the  
276 methylation around these two regions, we find elevated methylation from  
277 27.142Mb-27.40Mb (259-kb long), more accurately demarking this region, see Figure  
278 1. To identify further male biased methylation windows, we performed a  
279 chromosome-wide scan calculating the degree of sex bias. Based on the pre-existing  
280 MHM region, we then selected all those regions with both a strongly significant sex  
281 bias ( $p < 1.75e-10$ , as compared to the average sex bias in methylation on the Z  
282 chromosome being  $p = 0.14$  and a 1.69 fold methylation difference between males  
283 and females) and with at least five adjacent methylation windows (see methods  
284 section).

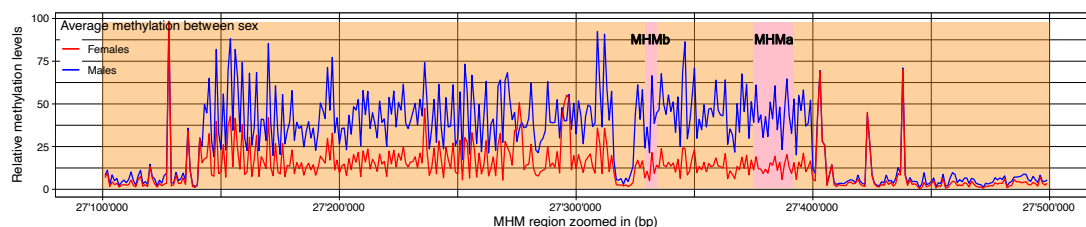

285

286

287 In total, 19 MHM regions (hereafter referred to as blocks) were identified (see Table  
288 1, Figure 2 and Supplementary Figure 1). Of these continuous blocks, 17 had genes in  
289 the local vicinity. In this instance, we defined local as being with 100kb of the MHM  
290 block, as in our previous study we found strong correlations between gene  
291 expression and DNA methylation even up to 100kb away from the gene itself. To test  
292 if dosage compensation acts locally on a gene-by-gene basis or uniformly throughout  
293 each block, the methylation levels within these MHM blocks were correlated with  
294 the neighbouring genes (see Table 1), i.e. individual methylation windows present

295 within each block were correlated with the expression of adjacent genes, controlling  
296 for multiple testing. Of the 17 blocks with adjacent genes, 14 had a significant  
297 correlation between at least one methylation window and local gene expression, see  
298 Figure 2 and Supplementary Figure 1. Interestingly, neighbouring genes frequently  
299 displayed differential correlation with methylation, indicating that these regions  
300 seem to be associated with expression on a gene-by-gene basis. In total, 51 unique  
301 genes (38 present in our dataset) were adjacent to these MHM-like blocks, with 224  
302 significant correlations with methylation levels (methylation windows) of which 134  
303 correlations were negative and 90 positive (tvalue from linear model). Furthermore,  
304 of the 38 genes present in our dataset, 34 had a significant sex bias expression with  
305 20 being expressed higher in males and 14 higher in females (M:F ratio). The average  
306 fold difference between males and females on the Z chromosome was 1.22 while for  
307 the autosomes this was 1.02. In the case of the original MHM region, apart from the  
308 RNase genes (EST probes X603141644 and X603862378 for the lncRNA  
309 *ENSGALG00000051419* in Figure 2) that are almost entirely silent in males, this  
310 region (see Figure 2, Supplementary Figure 1, and Table 1) also contains multiple  
311 genes that are still male-biased, but below the average degree of male-bias on the Z  
312 chromosome. Similarly, these genes tend to be positively correlated with local  
313 methylation, where such a correlation exists. This pattern is also replicated in the  
314 newly identified MHM regions (see MHM#1 and #2 in Figure 2, and  
315 MHM#12,13,14,15,16,19 in Supplementary Figure 1). Therefore, increased  
316 methylation in males is associated with a reduction in the differences in male-biased  
317 gene expression, but not eliminate it entirely, in both the existing and the new MHM  
318 regions. None of the methylation QTL detected on the Z chromosome (either QTL or  
319 phenotypes) overlapped with these MHM regions.

320

321 **(TABLE 1 PRESENTED SEPARATELY)**

322

323 One other MHM region has previously been putatively identified at 73.16-73.173Mb  
324 on the Z chromosome by Sun et al. (2019). We also identify this region in our data,  
325 though the median methylation threshold fell slightly below the threshold we set,  
326 and was therefore excluded initially (i.e. there was a strongly significant sex-

327 difference, but the median level of methylation over all individuals was lower than in  
 328 the original MHM region). Nevertheless, the region shows very significant DNA  
 329 methylation levels differences between the sexes (see Supplementary Table 2), with  
 330 significantly more male DNA methylation. All of the neighbouring genes to these  
 331 MHM regions

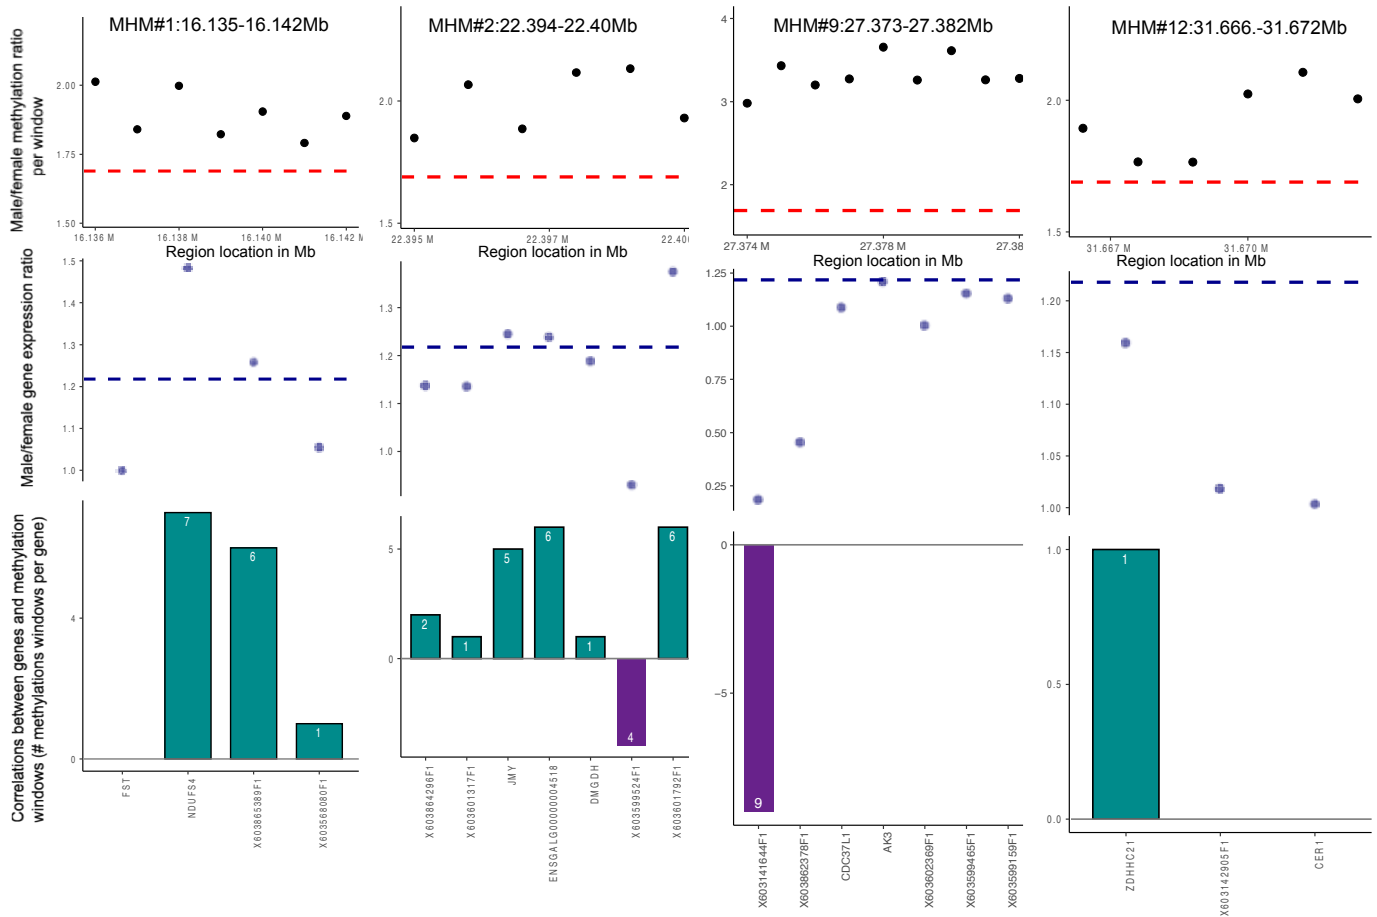

332

333

334 were also assessed for potential GO enrichment, with no GO enrichment found for  
335 those genes in the immediate vicinity.

336

### 337 **Female Hyper-Methylated Regions**

338 As well as additional MHM regions, a search for regions with a lower than average  
339 male: female methylation ratio was also performed to identify regions that showed a  
340 relative decrease in DNA methylation in males or an increase in DNA methylation in  
341 females. Using a criterion of a significant increase in female methylation, relative to  
342 males, we firstly identified a total of 118 1kb windows that were significantly more  
343 methylated in females than males (see Table 2 and Supplementary Table 3). Of  
344 these, three regions consisted of five or more consecutive female-biased methylated  
345 windows. These regions were located at 30195000-30200000bp, 42633000-  
346 42638000bp, and 49073000-49073000bp on the Z chromosome. No genes were  
347 found in these regions, however. An overlap between methylation QTL and these  
348 regions was also performed, though once again no overlaps occurred.

| methbin       | chr | pos      | avg    | median | avg_male | avg_female | pvalue   | MF_avg | MF_runavg | FHM_blockid |
|---------------|-----|----------|--------|--------|----------|------------|----------|--------|-----------|-------------|
| chrZ_30195000 | Z   | 30195000 | 80.17  | 70.52  | 71.05    | 91.62      | 1.41E-02 | 0.78   | 1.26      | 1           |
| chrZ_30196000 | Z   | 30196000 | 52.73  | 48.01  | 42.69    | 65.32      | 2.07E-05 | 0.65   | 1.25      | 1           |
| chrZ_30197000 | Z   | 30197000 | 78.65  | 73.65  | 70.17    | 89.28      | 7.32E-03 | 0.79   | 1.23      | 1           |
| chrZ_30198000 | Z   | 30198000 | 66.48  | 60.78  | 56.40    | 79.13      | 2.62E-04 | 0.71   | 1.20      | 1           |
| chrZ_30199000 | Z   | 30199000 | 69.29  | 61.94  | 61.36    | 79.25      | 1.64E-02 | 0.77   | 1.18      | 1           |
| chrZ_30200000 | Z   | 30200000 | 32.70  | 30.17  | 28.75    | 37.65      | 1.92E-02 | 0.76   | 1.16      | 1           |
| chrZ_42633000 | Z   | 42633000 | 57.33  | 50.01  | 49.31    | 67.39      | 4.38E-03 | 0.73   | 1.53      | 2           |
| chrZ_42634000 | Z   | 42634000 | 81.07  | 76.75  | 67.55    | 98.04      | 1.25E-05 | 0.69   | 1.50      | 2           |
| chrZ_42635000 | Z   | 42635000 | 64.55  | 59.29  | 54.35    | 77.36      | 1.73E-04 | 0.70   | 1.46      | 2           |
| chrZ_42636000 | Z   | 42636000 | 64.06  | 59.41  | 55.99    | 74.20      | 4.46E-03 | 0.75   | 1.43      | 2           |
| chrZ_42637000 | Z   | 42637000 | 87.94  | 82.79  | 77.66    | 100.85     | 1.71E-03 | 0.77   | 1.43      | 2           |
| chrZ_42638000 | Z   | 42638000 | 77.38  | 73.39  | 69.06    | 87.82      | 2.81E-02 | 0.79   | 1.42      | 2           |
| chrZ_49068000 | Z   | 49068000 | 33.32  | 33.10  | 29.34    | 38.32      | 9.41E-04 | 0.77   | 1.43      | 3           |
| chrZ_49069000 | Z   | 49069000 | 103.06 | 93.79  | 88.37    | 121.50     | 2.15E-04 | 0.73   | 1.41      | 3           |
| chrZ_49070000 | Z   | 49070000 | 73.53  | 64.76  | 61.14    | 89.06      | 1.55E-04 | 0.69   | 1.38      | 3           |
| chrZ_49071000 | Z   | 49071000 | 82.15  | 76.27  | 69.69    | 97.78      | 2.40E-04 | 0.71   | 1.34      | 3           |
| chrZ_49072000 | Z   | 49072000 | 109.91 | 100.09 | 91.25    | 133.31     | 1.73E-06 | 0.68   | 1.31      | 3           |
| chrZ_49073000 | Z   | 49073000 | 51.46  | 46.02  | 42.84    | 62.27      | 4.95E-04 | 0.69   | 1.27      | 3           |

349

### 350 **Methylation QTL present on the Z chromosome**

351 Methylation QTL were assessed by performing local (cis) methylation QTL scans  
352 restricted solely to the Z chromosome. In addition, trans scans were also performed,  
353 where the QTL was located on the Z chromosome, but the target methylation  
354 window was free to be present on either the Z chromosome or the autosomes. In  
355 total, we identify 18 significant cis methylation QTL and 53 significant trans

356 methylation QTL that are based on the Z chromosome, with a further 20 suggestive  
357 cis methylation QTL and 528 trans methylation QTL. As expected, most of the  
358 methylation QTL (n=528) had a significant sex interaction effect. This is expected due  
359 to the large differences in Z chromosome methylation between males and females,  
360 with males possessing two methylated chromosomes (ZZ) and females only one  
361 (ZW). A full list of all methylation QTL can be found in Supplementary Table 4. In  
362 addition, 51 expression QTL (eQTL) were identified on the Z chromosome (either as a  
363 QTL or the trans-effect phenotype of a QTL), see Supplementary Table 5.  
364

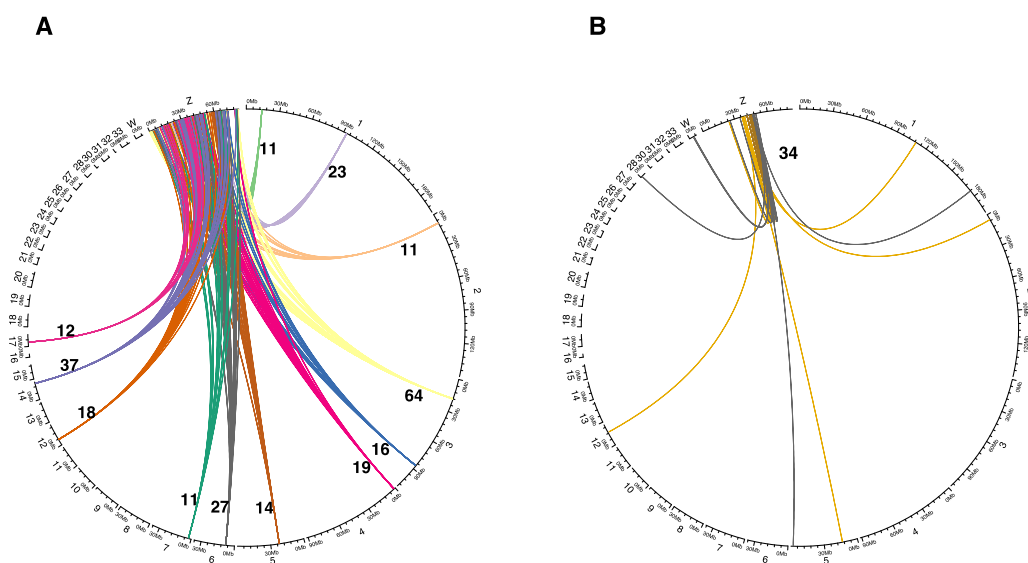

365 ready.  
366

367

### 368 **Trans Methylation QTL Hotspots Affecting the Z chromosome**

369 To identify trans-acting hotspots, we identified where multiple methylation QTL  
370 were associated with the same marker and had overlapping confidence intervals. Of  
371 the 619 methylation QTL on the Z chromosome, these mapped to 141 different SNP  
372 loci. Of these loci, 13 were associated with multiple methylation  
373 windows/phenotypes (10 or more methylation windows associated with each  
374 marker, respectively). These hotspots on average spanned 5.87Mb of physical  
375 distance in the genome (found by taking the shared overlapping confidence intervals

376 and finding the minimum overlapping size), see Table 3. Of note, all bar one (n=12)  
 377 of these trans hotspots were located on the autosomes, but regulated variation in  
 378 methylation on the Z chromosome. Of these 12, 3 were previously identified as  
 379 regulating methylation variation on the autosomes in this intercross (Höglund et al.  
 380 2020), on chromosomes 3 (at 18Mb, hotspot 4), 6 (at 7.7Mb, hotspot 6) and 7 (at 2.4  
 381 Mb, hotspot 9). One hotspot was located on the Z chromosome (at 41.7Mb, hotspot  
 382 13, with this hotspot spread over three adjacent SNPs, rs16768340, rs16782623,  
 383 rs14016786, see Supplementary Table 4) regulated variation in methylation on  
 384 different windows in the Z chromosome, as well as some methylation windows on  
 385 the autosomes. Thus, whilst the majority of regulation in methylation variation  
 386 appears to be located on the autosomes, with these loci then regulating methylation  
 387 on the Z chromosome, there is also some regulation of methylation variation by the  
 388 Z chromosome itself, and even a small amount of autosomal regulation from the Z  
 389 chromosome. The genes present within these hotspots were further checked for  
 390 potential enrichment via gene ontology analysis, using DAVID 6.8  
 391 (<https://david.ncifcrf.gov/>). In total 3 hotspots showed enrichment using the DAVID  
 392 6.8 database: the hotspot (ID#2) at chr1@91.7MB contained genes enriched for  
 393 immunoglobulin-fold/domain, the hotspot (ID#5 in Table 3) on chr3@86.5Mb had  
 394 genes enriched for the activity of glutathione and metabolism of cytochrome P450,  
 395 and the hotspot (ID#6 in table 3) on chr4@1.3Mb contained genes enriched for  
 396 activity with rhodopsin, see Supplementary Table 6. The hotspots and their  
 397 distribution across the genome are illustrated in Figure 3. Gene enrichment analysis  
 398 was also performed for the target genomic regions in the vicinity ( $\pm 10$ kb) of each  
 399 methylation window associated with a methylation QTL hotspot. Some enrichment  
 400 was found for hotspot ID#4 (located on chromosome 3 at 17.98Mb), however, this  
 401 result was non-significant (Bonferroni  $p$ -value > 0.05).

| id         | num_qtl | marker        | chr | pos      | Cl_low_marker       | Cl_high_marker | Cl_low_pos | Cl_high_pos | Cl_size  | num_genes |
|------------|---------|---------------|-----|----------|---------------------|----------------|------------|-------------|----------|-----------|
| hotspot_1  | 11      | Gg_rs14793763 | 1   | 13847380 | Gg_rs13832402       | Gg_rs15194859  | 12488579   | 14847187    | 2358608  | 50        |
| hotspot_2  | 23      | Gg_rs14858437 | 1   | 92741754 | Gg_rs13901810       | Gg_rs13910957  | 91200315   | 101131756   | 9931441  | 129       |
| hotspot_3  | 11      | Gg_rs15060526 | 2   | 8387159  | Gg_rs14132382       | Gg_rs14139143  | 5843745    | 11697701    | 5853956  | 87        |
| hotspot_4  | 64      | Gg_rs15282380 | 3   | 17984384 | X3_16300000         | Gg_rs14327472  | 15489694   | 23999342    | 8509648  | 201       |
| hotspot_5  | 16      | Gg_rs15416272 | 3   | 86515515 | Gg_rs15403420       | Gg_rs15427786  | 79192646   | 91808917    | 12616271 | 177       |
| hotspot_6  | 19      | X4_1267185    | 4   | 1286191  | X4_1267185          | Gg_rs13546113  | 1286191    | 1841819     | 555628   | 39        |
| hotspot_7  | 14      | Gg_rs15679503 | 5   | 22362570 | snp.98.79.91070.S.2 | Gg_rs15685956  | 17614557   | 25665093    | 8050536  | 184       |
| hotspot_8  | 27      | Gg_rs14568888 | 6   | 7742744  | Gg_rs15765462       | Gg_rs15777012  | 6568227    | 10633493    | 4065266  | 72        |
| hotspot_9  | 11      | Gg_rs15828492 | 7   | 2469584  | Gg_rs15826188       | Gg_rs16575534  | 1680380    | 3673817     | 1993437  | 26        |
| hotspot_10 | 18      | Gg_rs13609494 | 12  | 5538321  | Gg_rs13621493       | Gg_rs14974529  | 3076405    | 6304262     | 3227857  | 92        |
| hotspot_11 | 37      | rbl1871       | 14  | 15000631 | Gg_rs15002638       | rbl1871        | 13628710   | 15000631    | 1371921  | 52        |
| hotspot_12 | 12      | Gg_rs13744918 | 17  | 3944254  | Gg_rs15033588       | Gg_rs13744523  | 2473253    | 5465495     | 2992242  | 76        |
| hotspot_13 | 39      | GG_rs16782623 | Z   | 41699011 | Gg_rs16768340       | Gg_rs16114279  | 37374725   | 52128174    | 14753449 | 176       |

## 403 **Causality Analysis Between Methylation and Gene Expression on the Z** 404 **chromosome**

405 In total 360 overlaps were found between eQTL and methylation QTL. These were  
406 methylation and expression QTL where either the QTL or methylation phenotype  
407 were located on the Z chromosome. The overlapping phenotypes (gene expression  
408 and methylation) were tested for association using a linear model. Of these, 15  
409 overlaps were significant after applying an FDR-based multiple testing corrections.  
410 Eleven of the overlaps were significant ( $p$ -value  $< 0.05$ , FDR corrected) using all  
411 individuals, while 3 were significant ( $p$ -value  $< 0.05$ , FDR corrected) using only  
412 females, and 1 was significant ( $p$ -value  $< 0.05$ , FDR corrected) using only males, see  
413 Table 4. These overlaps contained 5 unique probesets belonging to 2 unique genes  
414 and 3 ESTs. The gene LINGO1 (*ENSGALG00000002708*; chr10:3212741-3290778) is  
415 an immunoglobulin domain protein (Yang, Jiang et al. 2022). Immunoglobulin activity  
416 was also found in the methylation QTL hotspot on chromosome 3. Additionally, the  
417 15 overlaps were tested with NEO, a network edge orientated method which uses  
418 the underlying QTL genotype as anchors for the network (Aten et al., 2008), to assess  
419 the orientation of the observed correlation. Four of the overlaps had a LEO.NB.OCA-  
420 score  $> 0.3$ . Both eQTL and mQTL originated from the same genotype (imputed  
421 marker position) and thus are treated as a single-marker orientation where a  
422 LEO.NB.OCA-score  $> 1.0$  is significant. Hence, our results indicate that the EST  
423 X603598164F1 (gene id: *ENSGALG000000050497*, chrZ:44706094-44707218)  
424 influences the methylation levels in the region of chrZ:45163000-45165000, see  
425 Table 4. This gene has been retired on the GalGal6 genome, with no known function.  
426 In addition one further EST (X603865974) was suggestive (LEO.NB.OCA  $> 0.8$ ), with  
427 methylation appearing to drive gene expression in this case. However, as the model  
428  $p$ -value was significant, this means that other models (gene expression driving  
429 methylation) cannot be ruled out.



| probeset     | eqtCI              | methbin       | mqtlCI             | pvalue  | sexpvalue | male_pvalue | female_pvalue | ensembl_id          | neo_edge     | LEO.NB.OCA | LEO.NB.CPA | model_pvalue |
|--------------|--------------------|---------------|--------------------|---------|-----------|-------------|---------------|---------------------|--------------|------------|------------|--------------|
| X603602693F1 | chrX:317.15-360.02 | chrZ_8007000  | chrX:66.27-353.15  | 3.5E-01 | 6.3E-01   | 8.8E-01     | 3.1E-02       | #N/A                | meth->genexp | 0.44       | 0.44       | 0.25         |
| X603602693F1 | chrX:317.15-360.02 | chrZ_45165000 | chrX:335.14-348.56 | 8.6E-02 | 3.2E-01   | 7.2E-01     | 3.8E-02       | #N/A                | meth->genexp | 0.03       | 0.03       | 0.06         |
| X603602693F1 | chrX:317.15-360.02 | chrZ_45166000 | chrX:335.14-348.56 | 3.5E-01 | 1.4E-01   | 9.2E-01     | 4.2E-03       | #N/A                |              | n.s        |            |              |
| X603598164F1 | chrX:317.15-408.11 | chrZ_43720000 | chrX:317.15-353.15 | 1.2E-02 | 1.3E-09   | 8.1E-02     | 8.6E-01       | ENSGALG000000050497 |              | n.s        |            |              |
| X603598164F1 | chrX:317.15-408.11 | chrZ_43860000 | chrX:335.14-353.15 | 3.9E-03 | 1.3E-09   | 1.7E-02     | 9.6E-01       | ENSGALG000000050497 |              | n.s        |            |              |
| X603598164F1 | chrX:317.15-408.11 | chrZ_43861000 | chrX:335.14-348.56 | 2.5E-03 | 4.8E-10   | 3.5E-02     | 7.4E-01       | ENSGALG000000050497 |              | n.s        |            |              |
| X603598164F1 | chrX:317.15-408.11 | chrZ_43862000 | chrX:0-353.15      | 1.3E-02 | 1.3E-09   | 8.3E-02     | 9.8E-01       | ENSGALG000000050497 |              | n.s        |            |              |
| X603598164F1 | chrX:317.15-408.11 | chrZ_45164000 | chrX:335.14-348.56 | 1.0E-03 | 1.9E-06   | 1.7E-02     | 7.3E-01       | ENSGALG000000050497 | genexp->meth | 1.60       | 1.60       | 0.21         |
| X603598164F1 | chrX:317.15-408.11 | chrZ_45165000 | chrX:335.14-348.56 | 6.2E-04 | 2.2E-05   | 1.7E-02     | 7.4E-01       | ENSGALG000000050497 | genexp->meth | 2.13       | 2.13       | 0.05         |
| X603598164F1 | chrX:317.15-408.11 | chrZ_45166000 | chrX:335.14-348.56 | 3.3E-02 | 1.6E-06   | 2.1E-01     | 5.8E-01       | ENSGALG000000050497 |              | n.s        |            |              |
| X603598164F1 | chrX:317.15-408.11 | chrZ_46826000 | chrX:0-408.11      | 3.7E-02 | 1.4E-08   | 2.1E-01     | 7.0E-01       | ENSGALG000000050497 |              | n.s        |            |              |
| X603598164F1 | chrX:317.15-408.11 | chrZ_47304000 | chrX:348.56-360.02 | 3.3E-02 | 4.5E-05   | 3.7E-01     | 2.2E-02       | ENSGALG000000050497 |              | n.s        |            |              |
| X603865974F1 | chrX:317.15-408.11 | chrZ_47304000 | chrX:348.56-360.02 | 5.4E-02 | 7.5E-02   | 4.6E-02     | 7.3E-01       | #N/A                | meth->genexp | 0.94       | 0.94       | 0.04         |
| X603862692F1 | chrX:317.15-335.14 | chrZ_29446000 | chrX:0-335.14      | 2.5E-03 | 9.9E-01   | 8.7E-01     | 4.2E-03       | #N/A                |              | n.s        |            |              |
| X603602881F1 | chrX:317.15-335.14 | chrZ_29446000 | chrX:0-335.14      | 2.5E-03 | 7.5E-01   | 9.6E-01     | 4.2E-03       | ENSGALG00000002708  | meth->genexp | 0.05       | 0.05       | 0.96         |

430

431

## 432 DISCUSSION

433 Using this wild x domestic paradigm to analyse DNA methylation and its regulation  
 434 on the Z chromosome in the chicken, we firstly identify over 600 methylation QTL  
 435 that affect methylation on the Z chromosome. Of these, the majority of trans effect  
 436 loci are located on the autosomes but affecting the Z chromosome. There were also  
 437 examples of the reverse, with trans methylation QTL deriving from the Z  
 438 chromosome but affecting DNA methylation on the autosomes. Furthermore, these  
 439 trans methylation QTL were concentrated into a small number of hotspots located  
 440 on the autosomes (n=12), with one hotspot also present on the Z chromosome itself,  
 441 associated with methylation on the Z chromosome and the autosomes, respectively.  
 442 A total of five genes on the Z chromosome were also candidates for causality  
 443 between gene expression and methylation, with two passing the network-edge-  
 444 based threshold for significance. Of these, one appears to be a retired gene, whilst  
 445 the other is an EST of no known function, with the former indicating gene expression  
 446 affects methylation, whilst the latter indicates that methylation was modifying gene  
 447 expression.

448

449 The nature of the intercross (a wild bird intercrossed with domestics) allows us to  
 450 identify consistent differences in methylation that exist between wild and domestic  
 451 chickens and the regions that associate with and potentially regulate them. With  
 452 regards to the methylation QTL hotspots identified, it is noteworthy that these are  
 453 almost all based on the autosomes, with only one situated on the Z chromosome  
 454 itself. Therefore, the regulation of domestication-based phenotypes with loci present  
 455 on the Z chromosome appears to generally be autosomally regulated, although the  
 456 reverse (where autosomal gene expression is regulated by the sex chromosomes)

457 also occurs. Interestingly, three of the hotspots previously identified as regulating  
458 DNA methylation in domestication (primarily via reducing DNA methylation in  
459 domestic birds) also appear to regulate DNA methylation on the Z chromosome  
460 (Höglund 2020).

461

462 As well as the regulation of variation in methylation, we also identified additional  
463 Male Hyper-Methylated regions present on the Z chromosome. Unlike the initial  
464 MHM region found (Teranishi, Shimada et al. 2001), which identified that the  
465 lncRNAs present were completely switched off in males, the regions we identify  
466 appear to instead decrease male gene expression, though rather than reduce it  
467 entirely, it is instead down-regulated to levels more closely found in females (i.e.  
468 reduced male gene expression, relative to female gene expression). This is despite  
469 the regions having a similar pattern of sex-differentiated methylation as is seen in  
470 the original MHM region. Further, the strength of the methylation differences  
471 between sexes was greater in the new regions we identified when compared to the  
472 region at 74Mb (although we also identify the 74Mb MHM region as well). These  
473 genes thus appear to be linked to sex-based differences between males and females.  
474 No methylation QTL overlap these regions, implying that these regions are not  
475 responsible for regulating variation in methylation, which would then fit with these  
476 regions instead regulating more basal sex-differences rather than between-  
477 population variation. This idea is reinforced when considering the functions of the  
478 genes in these regions.

479

480 Of the 18 known genes that are present within the MHM regions, their  
481 functions can be broadly divided into learning/ behaviour, bone allocation,  
482 development, reproduction, growth/ metabolism and methyl transferase activities.  
483 These tie-in well with the known sex-differences that exist in the chicken. Starting  
484 with behaviour, strong behavioural differences exist between males and female  
485 chickens (Vallortigara, Cailotto et al. 1990, Nätt, Agnvall et al. 2014, Elfving, Nätt et  
486 al. 2015, Bélteky, Agnvall et al. 2018). In particular, females have decreased anxiety-  
487 related behaviour, though this may be test-dependent (Schutz, Kerje et al. 2002,  
488 Campler, Jöngren et al. 2009, Johnsson, Williams et al. 2016, Johnsson, Henriksen et

489 al. 2018, Fogelholm, Inkabi et al. 2019). Of the genes present in the MHM, four are  
490 related to behaviour or neurogenesis. The gene *SLC1A1* has been shown to play a  
491 role in obsessive compulsive disorder and stereotype behaviour (Zike, Chohan et al.  
492 2017, Huang, Liu et al. 2021), as well as schizophrenia susceptibility (Horiuchi, Iida et  
493 al. 2012, Li, Su et al. 2020). Anxiety behaviour in chickens has previously been shown  
494 to be related to schizophrenia, depression and other mood-based disorders in  
495 humans, even sharing some of the same susceptibility loci (Johnsson, Williams et al.  
496 2016, Johnsson, Henriksen et al. 2018). Furthermore, the OCD effects arising from  
497 *SLC1A1* are stronger in males, so sex-differences in the gene effects have already  
498 been demonstrated (Wendland, Moya et al. 2009, Veenstra-VanderWeele, Xu et al.  
499 2012). *ZDHHC2I* is a major palmitoyl acyltransferase, with decreasing expression  
500 leading to increased depression-like behaviours (Gorinski, Bijata et al. 2019). *Homer1*  
501 also has functions relating to learning and memory (Clifton, Cameron et al. 2017),  
502 and also causes susceptibility to Alzheimers (Urdánoz-Casado, Sánchez-Ruiz de  
503 Gordo et al. 2021). In the case of the latter, these effects are strongly sex-  
504 dependent, only occurring in women.

505

506 Continuing with bone allocation, female chickens have a complex bone  
507 allocation, whereby during egg production the hard outer cortical bone is first  
508 mobilised into soft, spongy medullary bone in the centre of the femur, before then  
509 being transferred to create the egg shell (one of the major limiting factors in egg  
510 production) (Bloom, Domm et al. 1958, Mueller, Schraer et al. 1964). Therefore male  
511 and female chickens differ markedly in their bone metabolism – males possess  
512 almost no medullary bone, whilst female medullary bone deposition is strongly  
513 associated with reproductive output (Johnsson, Gustafson et al. 2012, Johnsson,  
514 Rubin et al. 2014, Johnsson, Jonsson et al. 2015). Of the genes in the MHM, *Homer1*  
515 has numerous beneficial effects in osteoblasts including beta-catenin stabilization  
516 (Rybczyn, Brennan-Speranza et al. 2021). *FST* (foillistatin) is also a powerful regulator  
517 of bone metabolism (Gajos-Michniewicz, Piastowska et al. 2010). *CER1* has also been  
518 found to regulate bone mineral density and be associated with fracture risk. Of note,  
519 these effects are found to be strongest in post-menopausal women (Koromila,  
520 Dailiana et al. 2012, Koromila, Georgoulas et al. 2013). *TLE4* is a critical mediator of

521 osteoblasts and *runx2*-dependent bone development in the mouse (Shin, Theodorou  
522 et al. 2021). Finally, *NANS* affects skeletal development in zebrafish knock-outs (van  
523 Karnebeek, Bonafé et al. 2016). Continuing with reproduction-related genes, the  
524 gene *FST* plays a critical role in mouse uterine receptivity and decidualization  
525 (Fullerton, Monsivais et al. 2017), whilst the gene *JMY* mediates spermatogenesis in  
526 mice (Liu, Fan et al. 2020) as well as asymmetric division and cytokinesis in mouse  
527 oocytes (Sun, Sun et al. 2011). Finally, *CLTA4* is involved in the maintenance of  
528 chronic inflammation in endometriosis and infertility (Abramiuk, Bębnowska et al.  
529 2021).

530

531 The final category of genes present in the MHM regions affected growth and  
532 metabolism, whilst two methyltransferase genes were also present. Large  
533 differences in growth and bodyweight exist in the chicken, with males often twice  
534 the bodyweight of females. The gene *FST*, as well as affecting reproduction-related  
535 phenotypes, also leads to increased muscle weight in mice when over-expressed  
536 (Iyer, Chugh et al. 2021). *DMGDH* affects body growth through insulin-like growth  
537 factor (Baker et al 1993), whilst also affecting selenium status in pregnant women  
538 (Mao, Vanderlelie et al. 2016). *ABHD3* regulates adipogenic differentiation and lipid  
539 metabolism (Linke, Overmyer et al. 2020). Finally, *BHMT* is a methyltransferase, as is  
540 *DMGDH*.

541

542 In the current study, we have restricted the investigation to a single tissue,  
543 albeit repeated in 124 individuals. As such, we are confident that these MHM regions  
544 and methylation QTL are present in this tissue type. However the ubiquity of these  
545 methylated regions in other tissues must be verified. This opens up the possibility  
546 that multiple further MHM regions also exist, but are only present in specific tissue  
547 types. This could allow fine-scale regulation of sex differences in a tissue-specific  
548 manner. We also assess female-specific hyper-methylated regions, but these were  
549 found to be very sparse and had very few genes present, suggesting these are of less  
550 importance. In summary, by using a large number of replicates that are assessed for  
551 all methylated loci on the Z chromosome, we identify both novel MHM regions in an

552 intra-specific/ inter-population framework, as well as the role that domestication  
553 plays in the regulation of the Z chromosome and the genes on it.

554

## 555 **Acknowledgements**

556 The research was carried out within the framework of the Swedish Centre of  
557 Excellence in Animal Welfare Science, and the Linköping University Neuro-network.  
558 SNP genotyping was performed by the Uppsala Sequencing Center. Bioinformatic  
559 support was provided by NBIS (National Bioinformatics Infrastructure Sweden). The  
560 project was supported by grants from the European Research Council (Advanced  
561 grant GENEWELL and Consolidator grant FERALGEN 772874), the Swedish Research  
562 Council (VR), Carl Tryggers Stiftelse, and the Linköping University Neuro-network.

563

564

565

566

567

568

569

## 570 **Figure Legends**

571 Figure 1. MHMa and MHMb regions (used to identify the original MHM region) and  
572 sex differences in methylation levels at these and the surrounding area. Male  
573 methylation is shown in blue, female methylation is shown in red.

574

575 Figure 2. Four of the 19 Novel MHM regions present on the Z chromosome and their  
576 effects on gene expression. Panes illustrate regions 1, 2, 9, 12 (selected as being  
577 representative of all the regions). Each pane consists of the following: i) The  
578 male:female methylation ratio for the 1kb methylation windows that make up the  
579 MHM region (each black dot represents the ratio at one methylation window). The  
580 red hashed line at the base indicates the average male:female methylation ratio  
581 (~1.7).

582 ii) Male:female gene expression ratio is indicated by the blue dots, one for each gene  
583 in the region, with the ratio shown on the left-side y-axis, and the blue hashed line  
584 indicating the average male:female gene expression ratio on the Z chromosome  
585 (~1.2).

586 iii) The number of correlations between each gene and the 1kb methylation windows  
587 that make up each MHM. The direction of the correlation (positive or negative) is  
588 indicated by the bar being above the line (positive, coloured turquoise) or below the  
589 line (negative, coloured purple). The number of correlations is indicated on each bar,  
590 whilst each gene name is given on the x-axis.

591

592 Figure 3. Circle plot showing the location of trans methylation QTL hotspots that  
593 affect DNA methylation variation on the Z chromosome. (A) The 12 autosomal

594 hotspots affecting Z DNA methylation, and (B) the single Z chromosome hotspot  
595 affecting Z and autosomal methylation.

596

597

598

599

## 600 **Table Legends**

601 Table 1. Novel Male Hyper-Methylated (MHM) regions identified in the  
602 hypothalamus. The 17 MHM regions containing genes are divided into separate  
603 regions, with their location, size, number of probesets present initially given. Also  
604 included are the average gene expression values for males and females, the p-value  
605 of the sex differences in gene expression, the ratio of male:female gene expression,  
606 the number of 1kb windows present within the MHM region that correlate with each  
607 gene and the direction of that correlation.

608

609 Table 2. Novel Female Hyper-Methylated regions identified in the hypothalamus. The  
610 position, average and median methylation per window, and the average methylation  
611 in males and females per window are all given, as well as the significance of the sex-  
612 difference and the average male:female fold ratio.

613

614 Table 3. List of trans methylation QTL hotspots. Table shows the number of  
615 methylation QTL present for each hotspot, its chromosome and base-pair position  
616 (nearest marker), and the confidence interval of each hotspot. The number of genes  
617 present within the intervals as determined by ensembl.org is also given.

618

619 Table 4. NEO causality of gene regulation of methylation. The probeset and the  
620 methylation window being tested, along with their confidence interval is presented.  
621 In addition, the genotype p-value, the sex p-value (also broken down into male and  
622 female), as well as the actual causality statistics (leo.nb.oqa and cpa and the model  
623 p-value) are all shown.

624

625

626

627

628 Supplementary Table 1. MHMa and MHMb regions. The position, average and  
629 median methylation per window, and the average methylation in males and females  
630 per window are all given, as well as the significance of the sex-difference and the  
631 average male:female fold ratio.

632

633

634 Supplementary Table 2. The previously identified MHM region at 73Mb. The  
635 position, average and median methylation per window, and the average methylation  
636 in males and females per window are all given, as well as the p-value and  
637 significance of the sex-difference and the average male:female fold ratio. Note for  
638 the significance of the sex difference, these are classified as non-significant,  
639 significant (including a multiple testing correction), and significant at the same level  
640 as the original MHM region.

641

642

643 Supplementary Table 3. All female hyper-methylated regions. The three FHM blocks  
644 (continuous regions) are highlighted in orange and indicated with their block ID in a  
645 separate column. The position, average and median methylation per window, and  
646 the average methylation in males and females per window are all given, as well as  
647 the significance of the sex-difference and the average male:female fold ratio.

648

649

650 Supplementary Table 4. List of local (cis) and trans methylation QTL present on the Z  
651 chromosome. The phenotype of each methylation QTL (methylation window),  
652 nearest marker to the methylation QTL, LOD score, confidence interval, and nearest  
653 marker to each confidence are given, as well as whether the QTL is cis or trans in  
654 effect, are all given.

655

656 Supplementary Table 5. Expression QTL (eQTL) present on the Z chromosome.  
657 Closest marker, LOD score, confidence interval, presence or absence of sex  
658 interaction, and nearest marker to the confidence interval are all presented.

659

660 Supplementary Table 6. GO enrichments from methylation QTL hotspots. Category,  
661 GO term, p-value (absolute and also FDR controlled), genes involved and fold  
662 enrichment are all given.

663

664

665

666

667

668

## 669 REFERENCES

670 Abramiuk, M., D. Bębnowska, R. Hryniewicz, P. Niedźwiedzka-Rystwej, G. Polak,  
671 J. Kotarski, J. Roliński and E. Grywalska (2021). "CLTA-4 expression is associated  
672 with the maintenance of chronic inflammation in endometriosis and infertility."  
673 Cells **10**(3): 487.

674 Aten, J. E., T. F. Fuller, A. J. Lusk and S. Horvath (2008). "Using genetic markers to  
675 orient the edges in quantitative trait networks: the NEO software." BMC Systems  
676 Biology **2**(1): 34.

677 Bélteky, J., B. Agnvall, L. Bektic, A. Höglund, P. Jensen and C. Guerrero-Bosagna  
678 (2018). "Epigenetics and early domestication: differences in hypothalamic DNA  
679 methylation between red junglefowl divergently selected for high or low fear of  
680 humans." Genetics Selection Evolution **50**(1): 13.

681 Bloom, M. A., L. V. Domm, A. V. Nalbandov and W. Bloom (1958). "Medullary bone  
682 of laying chickens." American Journal of Anatomy **102**(3): 411-453.

683 Broman, K. W., D. M. Gatti, P. Simecek, N. A. Furlotte, P. Prins, S. Sen, B. S. Yandell  
684 and G. A. Churchill (2019). "R/qtl2: Software for Mapping Quantitative Trait Loci  
685 with High-Dimensional Data and Multiparent Populations." Genetics **211**(2):  
686 495-502.

687 Campler, M., M. Jöngren and P. Jensen (2009). "Fearfulness in red junglefowl and  
688 domesticated White Leghorn chickens." Behavioural Processes **81**(1): 39-43.



- 689 Clifton, N. E., D. Cameron, S. Trent, L. H. Sykes, K. L. Thomas and J. Hall (2017).  
690 "Hippocampal Regulation of Postsynaptic Density Homer1 by Associative  
691 Learning." Neural Plast **2017**: 5959182.
- 692 Darvasi, A. and M. Soller (1994). "Optimum spacing of genetic markers for  
693 determining linkage between marker loci and quantitative trait loci." Theoretical  
694 and Applied Genetics **89**(2-3): 351-357.
- 695 Elfving, M., D. Nätt, V. C. Goerlich-Jansson, M. Persson, J. Hjelm and P. Jensen  
696 (2015). "Early stress causes sex-specific, life-long changes in behaviour, levels of  
697 gonadal hormones, and gene expression in chickens." PLoS One **10**(5):  
698 e0125808.
- 699 Ellegren, H., L. Hultin-Rosenberg, B. Brunström, L. Dencker, K. Kultima and B.  
700 Scholz (2007). "Faced with inequality: chicken do not have a general dosage  
701 compensation of sex-linked genes." BMC biology **5**(1): 1-12.
- 702 Fang, H., C. M. Disteche and J. B. Berletch (2019). "X inactivation and escape:  
703 epigenetic and structural features." Frontiers in cell and developmental biology  
704 **7**: 219.
- 705 Fogelholm, J., S. Inkabi, A. Höglund, R. Abbey-Lee, M. Johnsson, P. Jensen, R.  
706 Henriksen and D. Wright (2019). "Genetical Genomics of Tonic Immobility in the  
707 Chicken." Genes **10**(5): 341.
- 708 Fullerton, P. T., Jr., D. Monsivais, R. Kommagani and M. M. Matzuk (2017).  
709 "Follistatin is critical for mouse uterine receptivity and decidualization." Proc  
710 Natl Acad Sci U S A **114**(24): E4772-e4781.
- 711 Gajos-Michniewicz, A., A. W. Piastowska, J. A. Russell and T. Ochedalski (2010).  
712 "Follistatin as a potent regulator of bone metabolism." Biomarkers **15**(7): 563-  
713 574.
- 714 Gaston, K. and M. Fried (1995). "CpG methylation has differential effects on the  
715 binding of YY1 and ETS proteins to the bi-directional promoter of the Surf-1 and  
716 Surf-2 genes." Nucleic acids research **23**(6): 901-909.
- 717 Gorinski, N., M. Bijata, S. Prasad, A. Wirth, D. Abdel Galil, A. Zeug, D. Bazovkina, E.  
718 Kondaurova, E. Kulikova, T. Ilchibaeva, M. Zareba-Koziol, F. Papaleo, D. Scheggia,  
719 G. Kochlamazashvili, A. Dityatev, I. Smyth, A. Krzystyniak, J. Wlodarczyk, D. W.  
720 Richter, T. Strelakova, S. Sigrüst, C. Bang, L. Hobuß, J. Fiedler, T. Thum, V. S.  
721 Naumenko, G. Pandey and E. Ponimaskin (2019). "Attenuated palmitoylation of  
722 serotonin receptor 5-HT1A affects receptor function and contributes to  
723 depression-like behaviors." Nat Commun **10**(1): 3924.
- 724 Guerrero-Bosagna, C. (2019). From epigenotype to new genotypes: Relevance of  
725 epigenetic mechanisms in the emergence of genomic evolutionary novelty.  
726 Seminars in cell & developmental biology, Elsevier.
- 727 Heyn, H., S. Moran, I. Hernando-Herraez, S. Sayols, A. Gomez, J. Sandoval, D. Monk,  
728 K. Hata, T. Marques-Bonet and L. Wang (2013). "DNA methylation contributes to  
729 natural human variation." Genome research **23**(9): 1363-1372.
- 730 Höglund, A., R. Henriksen, J. Fogelholm, A. M. Churcher, C. G. Guerrero-Bosagna,  
731 A. Martinez Barrio, M. Johnsson, P. Jensen and D. Wright (2020). "The  
732 methylation landscape and its role in domestication and gene regulation in the  
733 chicken." Nature Ecology and Evolution **4**(12): 1713-1724.
- 734 Horiuchi, Y., S. Iida, M. Koga, H. Ishiguro, Y. Iijima, T. Inada, Y. Watanabe, T.  
735 Someya, H. Ujiike, N. Iwata, N. Ozaki, H. Kunugi, M. Tochigi, M. Itokawa, M. Arai, K.  
736 Niizato, S. Iritani, A. Kakita, H. Takahashi, H. Nawa and T. Arinami (2012).



737 "Association of SNPs linked to increased expression of SLC1A1 with  
738 schizophrenia." *Am J Med Genet B Neuropsychiatr Genet* **159b**(1): 30-37.  
739 Huang, X., J. Liu, J. Cong and X. Zhang (2021). "Association Between the SLC1A1  
740 Glutamate Transporter Gene and Obsessive-Compulsive Disorder in the Chinese  
741 Han Population." *Neuropsychiatr Dis Treat* **17**: 347-354.  
742 Irizarry, R. A., B. M. Bolstad, F. Collin, L. M. Cope, B. Hobbs and T. P. Speed (2003).  
743 "Summaries of Affymetrix GeneChip probe level data." *Nucleic Acids Research*  
744 **31**(4): e15.  
745 Itoh, Y., E. Melamed, X. Yang, K. Kampf, S. Wang, N. Yehya, A. Van Nas, K. Replogle,  
746 M. R. Band and D. F. Clayton (2007). "Dosage compensation is less effective in  
747 birds than in mammals." *Journal of biology* **6**(1): 1-15.  
748 Iyer, C. C., D. Chugh, P. J. Bobbili, A. J. B. Iii, A. E. Crum, A. F. Yi, B. K. Kaspar, K. C.  
749 Meyer, A. H. M. Burghes and W. D. Arnold (2021). "Follistatin-induced muscle  
750 hypertrophy in aged mice improves neuromuscular junction innervation and  
751 function." *Neurobiol Aging* **104**: 32-41.  
752 Johnsson, M., I. Gustafson, C.-J. Rubin, A.-S. Sahlqvist, K. B. Jonsson, S. Kerje, O.  
753 Ekwall, O. Kämpe, L. Andersson, P. Jensen and D. Wright (2012). "A Sexual  
754 Ornament in Chickens Is Affected by Pleiotropic Alleles at HAO1 and BMP2,  
755 Selected during Domestication." *PLoS Genetics* **8**(8): e1002914.  
756 Johnsson, M., R. Henriksen, J. Fogelholm, A. Höglund, P. Jensen and D. Wright  
757 (2018). "Genetics and genomics of social behavior in a chicken model." *Genetics*  
758 **209**(1): 209-221.  
759 Johnsson, M., K. B. Jonsson, L. Andersson, P. Jensen and D. Wright (2015).  
760 "Genetic Regulation of Bone Metabolism in the Chicken: Similarities and  
761 Differences to Mammalian Systems." *PLoS Genetics* **11**(5): e1005250.  
762 Johnsson, M., C. J. Rubin, A. Höglund, A. S. Sahlqvist, K. Jonsson, S. Kerje, O. Ekwall,  
763 O. Kämpe, L. Andersson, P. Jensen and D. Wright (2014). "The role of pleiotropy  
764 and linkage in genes affecting a sexual ornament and bone allocation in the  
765 chicken." *Molecular ecology* **23**(9): 2275-2286.  
766 Johnsson, M., M. J. Williams, P. Jensen and D. Wright (2016). "Genetical genomics  
767 of behavior: a novel chicken genomic model for anxiety behavior." *Genetics*  
768 **202**(1): 327-340.  
769 Kasowski, M., S. Kyriazopoulou-Panagiotopoulou, F. Grubert, J. B. Zaugg, A.  
770 Kundaje, Y. Liu, A. P. Boyle, Q. C. Zhang, F. Zakharia and D. V. Spacek (2013).  
771 "Extensive variation in chromatin states across humans." *Science* **342**(6159):  
772 750-752.  
773 Kilpinen, H., S. M. Waszak, A. R. Gschwind, S. K. Raghav, R. M. Witwicki, A. Orioli,  
774 E. Migliavacca, M. Wiederkehr, M. Gutierrez-Arcelus and N. I. Panousis (2013).  
775 "Coordinated effects of sequence variation on DNA binding, chromatin structure,  
776 and transcription." *Science* **342**(6159): 744-747.  
777 Koromila, T., Z. Dailiana, S. Samara, C. Chassanidis, C. Tzavara, G. P. Patrinos, V.  
778 Aleporou-Marinou and P. Kollia (2012). "Novel sequence variations in the CER1  
779 gene are strongly associated with low bone mineral density and risk of  
780 osteoporotic fracture in postmenopausal women." *Calcif Tissue Int* **91**(1): 15-23.  
781 Koromila, T., P. Georgoulas, Z. Dailiana, E. E. Ntzani, S. Samara, C. Chassanidis, V.  
782 Aleporou-Marinou and P. Kollia (2013). "CER1 gene variations associated with  
783 bone mineral density, bone markers, and early menopause in postmenopausal  
784 women." *Hum Genomics* **7**(1): 21.

785 Li, W., X. Su, T. Chen, Z. Li, Y. Yang, L. Zhang, Q. Liu, M. Shao, Y. Zhang, M. Ding, Y.  
786 Lu, H. Yu, X. Fan, M. Song and L. Lv (2020). "Solute Carrier Family 1 (SLC1A1)  
787 Contributes to Susceptibility and Psychopathology Symptoms of Schizophrenia  
788 in the Han Chinese Population." Front Psychiatry **11**: 559210.  
789 Linke, V., K. A. Overmyer, I. J. Miller, D. R. Brademan, P. D. Hutchins, E. A. Trujillo,  
790 T. R. Reddy, J. D. Russell, E. M. Cushing, K. L. Schueler, D. S. Stapleton, M. E.  
791 Rabaglia, M. P. Keller, D. M. Gatti, G. R. Keele, D. Pham, K. W. Broman, G. A.  
792 Churchill, A. D. Attie and J. J. Coon (2020). "A large-scale genome-lipid association  
793 map guides lipid identification." Nat Metab **2**(10): 1149-1162.  
794 Liu, Y., J. Fan, Y. Yan, X. Dang, R. Zhao, Y. Xu and Z. Ding (2020). "JMY expression  
795 by Sertoli cells contributes to mediating spermatogenesis in mice." Febs j  
796 **287**(24): 5478-5497.  
797 Lynch, M. and B. Walsh (1998). Genetics and Analysis of Quantitative traits.  
798 Sunderland, MA, Sinauer Associates.  
799 Mank, J. and H. Ellegren (2009). "All dosage compensation is local: gene-by-gene  
800 regulation of sex-biased expression on the chicken Z chromosome." Heredity  
801 **102**(3): 312-320.  
802 Mank, J. E. (2013). "Sex chromosome dosage compensation: definitely not for  
803 everyone." Trends in genetics **29**(12): 677-683.  
804 Mann, I. K., R. Chatterjee, J. Zhao, X. He, M. T. Weirauch, T. R. Hughes and C.  
805 Vinson (2013). "CG methylated microarrays identify a novel methylated  
806 sequence bound by the CEBPB| ATF4 heterodimer that is active in vivo." Genome  
807 research **23**(6): 988-997.  
808 Mao, J., J. J. Vanderlelie, A. V. Perkins, C. W. Redman, K. R. Ahmadi and M. P.  
809 Rayman (2016). "Genetic polymorphisms that affect selenium status and  
810 response to selenium supplementation in United Kingdom pregnant women."  
811 Am J Clin Nutr **103**(1): 100-106.  
812 McVicker, G., B. van de Geijn, J. F. Degner, C. E. Cain, N. E. Banovich, A. Raj, N.  
813 Lewellen, M. Myrthil, Y. Gilad and J. K. Pritchard (2013). "Identification of genetic  
814 variants that affect histone modifications in human cells." Science **342**(6159):  
815 747-749.  
816 Melamed, E. and A. P. Arnold (2007). "Regional differences in dosage  
817 compensation on the chicken Z chromosome." Genome biology **8**(9): 1-10.  
818 Mueller, W. J., R. Schraer and H. Scharer (1964). "Calcium metabolism and  
819 skeletal dynamics of laying pullets." The Journal of nutrition **84**(1): 20-26.  
820 Nalvarte, I., J. Rüegg and C. Guerrero-Bosagna (2018). Intrinsic and Extrinsic  
821 Factors That Influence Epigenetics. Epigenetics and Assisted Reproduction, CRC  
822 Press: 99-114.  
823 Nätt, D., B. Agnvall and P. Jensen (2014). "Large sex differences in chicken  
824 behavior and brain gene expression coincide with few differences in promoter  
825 DNA-methylation." PLoS One **9**(4): e96376.  
826 Rybchyn, M. S., T. C. Brennan-Speranza, D. Mor, Z. Cheng, W. Chang, A. D.  
827 Conigrave and R. S. Mason (2021). "The mTORC2 Regulator Homer1 Modulates  
828 Protein Levels and Sub-Cellular Localization of the CaSR in Osteoblast-Lineage  
829 Cells." Int J Mol Sci **22**(12).  
830 Schutz, K., S. Kerje, O. Carlborg, L. Jacobsson, L. Andersson and P. Jensen (2002).  
831 "QTL analysis of a red junglefowl x White Leghorn intercross reveals trade-off in  
832 resource allocation between behavior and production traits." Behavior Genetics  
833 **32**(6): 423-433.

- 834 Shin, T. H., E. Theodorou, C. Holland, R. Yamin, C. L. Raggio, P. F. Giampietro and  
835 D. A. Sweetser (2021). "TLE4 Is a Critical Mediator of Osteoblast and Runx2-  
836 Dependent Bone Development." *Front Cell Dev Biol* **9**: 671029.
- 837 Sun, D., D. L. Maney, T. S. Layman, P. Chatterjee and V. Y. Soojin (2019). "Regional  
838 epigenetic differentiation of the Z Chromosome between sexes in a female  
839 heterogametic system." *Genome research* **29**(10): 1673-1684.
- 840 Sun, S. C., Q. Y. Sun and N. H. Kim (2011). "JMY is required for asymmetric  
841 division and cytokinesis in mouse oocytes." *Mol Hum Reprod* **17**(5): 296-304.
- 842 Teranishi, M., Y. Shimada, T. Hori, O. Nakabayashi, T. Kikuchi, T. Macleod, R. Pym,  
843 B. Sheldon, I. Solovei and H. Macgregor (2001). "Transcripts of the MHM region  
844 on the chicken Z chromosome accumulate as non-coding RNA in the nucleus of  
845 female cells adjacent to the DMRT1 locus." *Chromosome Research* **9**(2): 147-165.
- 846 Urdániz-Casado, A., J. Sánchez-Ruiz de Gordo, M. Robles, B. Acha, M. Roldan, M.  
847 V. Zelaya, I. Blanco-Luquin and M. Mendioroz (2021). "Gender-Dependent  
848 Dereglulation of Linear and Circular RNA Variants of HOMER1 in the Entorhinal  
849 Cortex of Alzheimer's Disease." *Int J Mol Sci* **22**(17).
- 850 Vallortigara, G., M. Cailotto and M. Zanforlin (1990). "Sex differences in social  
851 reinstatement motivation of the domestic chick (*Gallus gallus*) revealed by  
852 runway tests with social and nonsocial reinforcement." *Journal of Comparative*  
853 *Psychology* **104**(4): 361.
- 854 van Karnebeek, C. D., L. Bonafé, X. Y. Wen, M. Tarailo-Graovac, S. Balzano, B.  
855 Royer-Bertrand, A. Ashikov, L. Garavelli, I. Mammi, L. Turolla, C. Breen, D. Donnai,  
856 V. Cormier-Daire, D. Heron, G. Nishimura, S. Uchikawa, B. Campos-Xavier, A.  
857 Rossi, T. Hennet, K. Brand-Arzamendi, J. Rozmus, K. Harshman, B. J. Stevenson, E.  
858 Girardi, G. Superti-Furga, T. Dewan, A. Collingridge, J. Halparin, C. J. Ross, M. I.  
859 Van Allen, A. Rossi, U. F. Engelke, L. A. Kluijtmans, E. van der Heeft, H. Renkema,  
860 A. de Brouwer, K. Huijben, F. Zijlstra, T. Heise, T. Boltje, W. W. Wasserman, C.  
861 Rivolta, S. Unger, D. J. Lefeber, R. A. Wevers and A. Superti-Furga (2016). "NANS-  
862 mediated synthesis of sialic acid is required for brain and skeletal development."  
863 *Nat Genet* **48**(7): 777-784.
- 864 Veenstra-VanderWeele, J., T. Xu, A. M. Ruggiero, L. R. Anderson, S. T. Jones, J. A.  
865 Himle, J. L. Kennedy, M. A. Richter, G. L. Hanna and P. D. Arnold (2012).  
866 "Functional studies and rare variant screening of SLC1A1/EAAC1 in males with  
867 obsessive-compulsive disorder." *Psychiatr Genet* **22**(5): 256-260.
- 868 Vicoso, B. and D. Bachtrog (2011). "Lack of global dosage compensation in  
869 *Schistosoma mansoni*, a female-heterogametic parasite." *Genome Biology and*  
870 *Evolution* **3**: 230-235.
- 871 Wendland, J. R., P. R. Moya, K. R. Timpano, A. P. Anavitarte, M. R. Kruse, M. G.  
872 Wheaton, R. F. Ren-Patterson and D. L. Murphy (2009). "A haplotype containing  
873 quantitative trait loci for SLC1A1 gene expression and its association with  
874 obsessive-compulsive disorder." *Arch Gen Psychiatry* **66**(4): 408-416.
- 875 Yang, H., L. Jiang, Y. Zhang, X. Liang, J. Tang, Q. He, Y. M. Luo, C. N. Zhou, L. Zhu, S.  
876 S. Zhang, K. Xiao, P. L. Zhu, J. Wang, Y. Li, F. L. Chao and Y. Tang (2022). "Anti-  
877 LINGO-1 antibody treatment alleviates cognitive deficits and promotes  
878 maturation of oligodendrocytes in the hippocampus of APP/PS1 mice." *J Comp*  
879 *Neurol* **530**(10): 1606-1621.
- 880 Yin, Y., E. Morgunova, A. Jolma, E. Kaasinen, B. Sahu, S. Khund-Sayeed, P. K. Das, T.  
881 Kivioja, K. Dave and F. Zhong (2017). "Impact of cytosine methylation on DNA

882 binding specificities of human transcription factors." Science **356**(6337):  
883 eaaj2239.  
884 Zhang, M., F.-B. Yan, F. Li, K.-R. Jiang, D.-H. Li, R.-L. Han, Z.-J. Li, R.-R. Jiang, X.-J. Liu  
885 and X.-T. Kang (2017). "Genome-wide DNA methylation profiles reveal novel  
886 candidate genes associated with meat quality at different age stages in hens."  
887 Scientific Reports **7**(1): 1-15.  
888 Zike, I. D., M. O. Chohan, J. M. Kopelman, E. N. Krasnow, D. Flicker, K. M. Nautiyal,  
889 M. Bubser, C. Kellendonk, C. K. Jones, G. Stanwood, K. F. Tanaka, H. Moore, S. E.  
890 Ahmari and J. Veenstra-VanderWeele (2017). "OCD candidate gene  
891 SLC1A1/EAAT3 impacts basal ganglia-mediated activity and stereotypic  
892 behavior." Proc Natl Acad Sci U S A **114**(22): 5719-5724.  
893
